# Supplementary material for: Seeding of Au on CdSe/CdS nanoplates using Langmuir–Blodgett technique
Source: Royal Society of Chemistry journal article supplement (doi:10.1039/c5ra26018c), 2016-01-01
Supplement: c5ra26018c1.pdf [file c5ra26018c1.pdf]

## Seeding of Au on CdSe/CdS nanoplates using Langmuir-Blodgett technique

Subhasis Das,<sup>a</sup> Biswarup Satpati,<sup>b</sup> Himani Chauhan,<sup>c</sup> Sasanka Deka,<sup>c</sup> Manoj Kumar Ghosalya,<sup>d</sup> Chinnakonda S. Gopinath<sup>d</sup> and Tanushree Bala<sup>\*a</sup>

### Supporting information-1

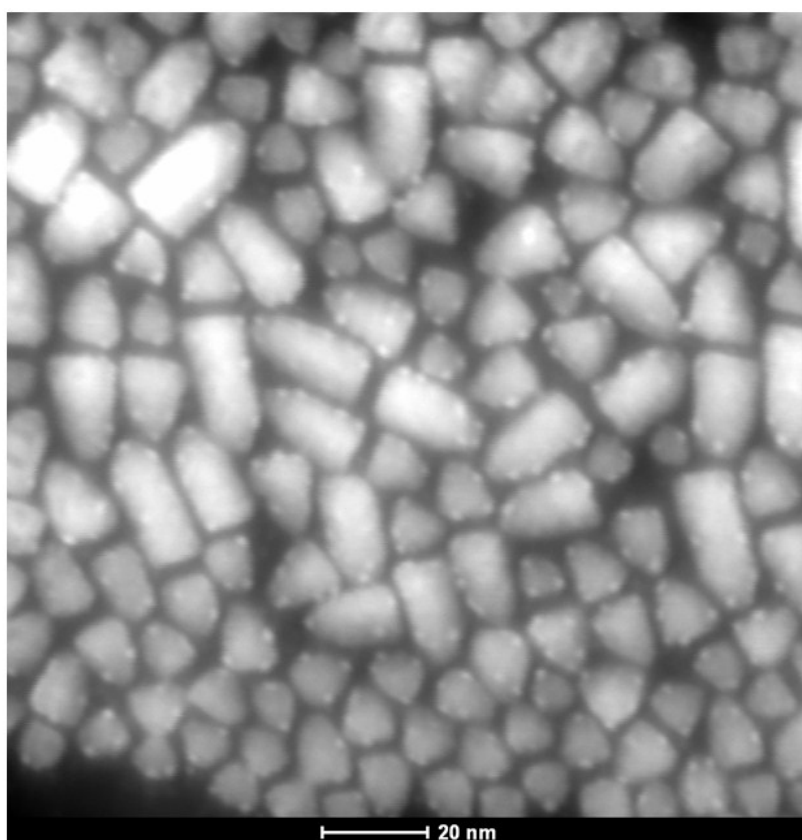

*SI-1: Scanning TEM-HAADF (Z-contrast) image of the hybrids after 10 min.*

## Supporting information-2

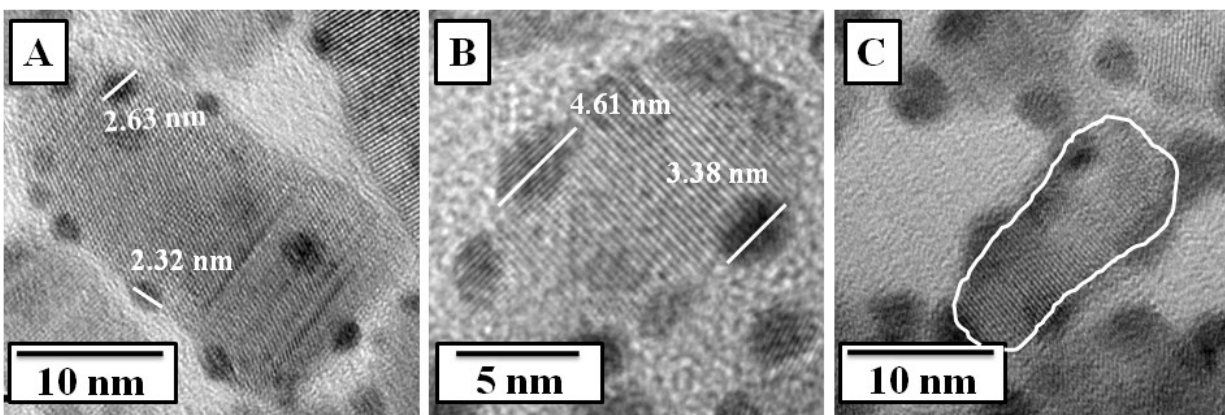

SI-2: TEM images of the samples obtained after spreading the CdSe/CdS nanoplates over aqueous  $\text{HAuCl}_4$  subphase on LB trough at  $t = 10$  min (A),  $t = 6$  h (B), and  $t = 12$  h (C). A clear growth in the size of the Au nanoseeds was observed in (B) as compared to (A). The Au seeds were found to coalesce effectively on prolonged exposure of the CdSe/CdS nanoplates to  $\text{HAuCl}_4$  subphase (C).
